# Supplementary material
Source: Copernicus journal article supplement (doi:10.5194/nhess-26-2551-2026)
Supplement: Supplementary file [file nhess-26-2551-2026-supplement-title-page.pdf › nhess-26-2551-2026-supplement-title-page.pdf]

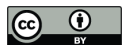

*Supplement of*

**Brief communication: Vent opening at Campi Flegrei – clues from dyke propagation patterns**

**Jacopo Selva and Nello Mangone**

*Correspondence to:* Jacopo Selva ([jacopo.selva@unina.it](mailto:jacopo.selva@unina.it))

- [nhess-26-2551-2026-supplement-title-page.pdf](#)
- [REV2\\_SelvaMangone\\_CFventOpening\\_supplementaryFigures.pdf](#)
- [SelvaMangone\\_CFventOpening\\_probabilitymaps.txt](#)

The copyright of individual parts of the supplement might differ from the article licence.
